# Supplementary material for: Impact of the 2015 El Niño-Southern Oscillation on the Abundance and Foraging Habits of Guadalupe Fur Seals and California Sea Lions from the San Benito Archipelago, Mexico
Source: PLoS One. 2016 May 12;11(5):e0155034. doi: 10.1371/journal.pone.0155034 (PMC4865164; doi:10.1371/journal.pone.0155034)
Supplement: S1 File — Information from 2012 and 2013 are included for the CLSs. (XLSX) [file pone.0155034.s001.xlsx]

## Sheet: Hoja1
TOTAL ABUNDANCE IN THE SAN BENITO ARCHIPELAGO
2014	Zalophus californianus
February	May	July	September	December
2796	1882	7136	5722	3968
2015	Zalophus californianus
February	May	July	September	December
2554	1151	3426	2580
Zalophus californianus		Both years
2014-02-01	2015-02-01	2014-05-01	2015-05-01	2014-07-01	2015-07-01	2014-09-01	2015-09-01	2014-12-01	2015-12-01
2796	2554	1882	1151	7136	3426	5722	2580	3968
ADULT FEMALE ABUNDANCE IN THE SAN BENITO ARCHIPELAGO
2014	Zalophus californianus
February	May	July	September	December
1086	729	2861	1437	1080
2015	Zalophus californianus
February	May	July	September	December
761	345	1261	888
PUP ABUNDANCE IN THE SAN BENITO ARCHIPELAGO
2014	Zalophus californianus
February	May	July	September	December
1373	979	2902	3538	2531
2015	Zalophus californianus
February	May	July	September	December
1567	609	1112	2580
PUPS PER MONTH-2015		Zalophus californianus
PUPS PER MONTH-2014		Zalophus californianus
Arctocephalus p. townsendi			2015 vs 2015
February	May	July	September	December
34	2095	3710	1433	519
50	1220	1494	801
Zalophus californianus			2015 vs 2015
February	May	July	September	December
2796	1882	7136	5722	3968
2555	1151	3426	2580
Arctocephalus p. townsendi			Both years
2014-02-01	2015-02-01	2014-05-01	2015-05-01	2014-07-01	2015-07-01	2014-09-01	2015-09-01	2014-12-01	2015-12-01
34	50	2095	1220	3710	1494	1433	801	519
A
California sea lion (CSL)
Date	MA	SM	F	J	P	M	TOTAL
31 July – 12 August 2012 (BS)	214	180	2710	586	3429	382	7501
6 – 14 February 2013	8	137	1210	101	2035	185	3672
2 – 11 July 2013 (BS)	540	195	3530	298	3944	352	8859
4 – 13 February 2014	6	57	1086	94	1373	180	2796
30 April – 5 May 2014	2	57	729	45	979	70	1882
30 June – 6 July 2014 (BS)	411	339	2861	320	2902	303	7136
11 – 14 September 2014	3	87	1437	249	3538	408	5722
5 – 9 December 2014	0	80	1080	117	2531	160	3968
B
Classes	July 2012	July 2013	July 2014
A. Females	2710/*4,173	3530/*4,342	2861/*3,519
Pups	3429/*3,885	3944/*4,437	2902/*3,130
Uncorrected/*Corrected data
